# Supplementary material for: Efficacy and safety of therapeutic anticoagulation for the treatment of isolated calf muscle vein thrombosis - a systematic review and meta-analysis
Source: Atypon-hosted journal article supplement (doi:10.1024/0301-1526/a000569), 2016-09-06
Supplement: 0301-1526_a000569_esm1.pdf [file 0301-1526_a000569_esm1.pdf]

**ESM Table 1.** Results of the quality assessment (risk of bias) using the framework of the Cochrane Collaboration Tool for RCT

| Authors & year       | Study type | Sequence generation | Allocation concealment | Blinding of participants, personnel, & outcome assessors | Incomplete outcome data | Select outcome reporting | Other sources of bias |
|----------------------|------------|---------------------|------------------------|----------------------------------------------------------|-------------------------|--------------------------|-----------------------|
| Schwarz et al., 2010 | RCT        | Low                 | High                   | Unclear                                                  | Low                     | Low                      | Low                   |
