# Supplementary material for: Efficacy and safety of therapeutic anticoagulation for the treatment of isolated calf muscle vein thrombosis - a systematic review and meta-analysis
Source: Atypon-hosted journal article supplement (doi:10.1024/0301-1526/a000569), 2016-09-06
Supplement: 0301-1526_a000569_esm2.pdf [file 0301-1526_a000569_esm2.pdf]

**ESM Table 2.** Results of the quality assessment (risk of bias) by MINORS for the NRCT

|                                              |                      |
|----------------------------------------------|----------------------|
| Authors & year                               | Schwarz et al., 2001 |
| Item                                         | Score                |
| Clearly stated aim                           | 2                    |
| Inclusion of consecutive patients            | 2                    |
| Prospective collection of data               | 2                    |
| Endpoints appropriate to aim of study        | 2                    |
| Unbiased assessment of study endpoint        | 0                    |
| Follow-up period appropriate to aim of study | 2                    |
| Loss to follow up, 5%                        | 2                    |
| Prospective calculation of study size        | 0                    |
| Adequate control group                       | 2                    |
| Contemporary groups                          | 2                    |
| Baseline equivalence of groups               | 2                    |
| Adequate statistical analyses                | 2                    |
| Total score                                  | 20                   |
