# Supplementary material for: Efficacy and safety of therapeutic anticoagulation for the treatment of isolated calf muscle vein thrombosis - a systematic review and meta-analysis
Source: Atypon-hosted journal article supplement (doi:10.1024/0301-1526/a000569), 2016-09-06
Supplement: 0301-1526_a000569_esm3.pdf [file 0301-1526_a000569_esm3.pdf]

**ESM Table 3.** Results of the quality assessment (risk of bias) by NOS for retrospective cohort studies

| Authors & year     | Selection |     |    |     | Comparability |    | Exposure |     |     | Total score |
|--------------------|-----------|-----|----|-----|---------------|----|----------|-----|-----|-------------|
|                    | 1         | 2   | 3  | 4   | 5             |    | 6        | 7   | 8   |             |
| Kret et al., 2013  | No        | Yes | No | Yes | Yes           | No | Yes      | Yes | Yes | 6           |
| Lautz et al., 2010 | No        | Yes | No | Yes | Yes           | No | Yes      | Yes | Yes | 6           |
| Sales et al., 2010 | No        | Yes | No | Yes | Yes           | No | Yes      | Yes | Yes | 6           |

1. Adequate definition of cases; 2. Representativeness of cases; 3. Selection of controls; 4. Definition of controls; 5. Comparability of cases and controls on the basis of design or analysis; 6. Ascertainment of exposure; 7. Same method used to ascertain cases and controls; 8. Non-response rate.
